# Supplementary material for: Delay of Germination-1 (DOG1): A Key to Understanding Seed Dormancy
Source: MDPI journal article supplement (doi:10.3390/plants9040480), 2020-04-09
Supplement: s1 [file s1]

|            |   |                                                               |                   |
|------------|---|---------------------------------------------------------------|-------------------|
| AtDOG1     | 1 | -----                                                         |                   |
| AtDOGL1    | 1 | -----                                                         |                   |
| AtDOGL2    | 1 | -----                                                         |                   |
| AtDOGL3    | 1 | -----                                                         |                   |
| AtDOGL4    | 1 | -----                                                         |                   |
| AtDOGL5    | 1 | -----                                                         |                   |
| BdDOG1L1   | 1 | -----                                                         |                   |
| BdDOG1L2   | 1 | -----                                                         |                   |
| BdDOG1L3   | 1 | -----                                                         |                   |
| BdDOG1L4   | 1 | -----                                                         |                   |
| BdDOG1L5-1 | 1 | -----                                                         |                   |
| BdDOG1L5-3 | 1 | -----                                                         | -MESRRGGG-        |
| BdDOG1L5-4 | 1 | -----                                                         | -MESRRGGG-        |
| BrDOG1     | 1 | -----                                                         |                   |
| HvDOG1L1   | 1 | -----                                                         |                   |
| HvDOG1L2   | 1 | -----                                                         |                   |
| HvDOG1L3   | 1 | -----                                                         |                   |
| HvDOG1L5-2 | 1 | -----                                                         |                   |
| HvDOG1L5-3 | 1 | -----                                                         | -MESRRGGGG        |
| LesadOG1   | 1 | -----                                                         |                   |
| LsDOG1     | 1 | -----                                                         |                   |
| OsDOG1L1   | 1 | -----                                                         |                   |
| OsDOG1L3   | 1 | -----                                                         |                   |
| OsDOG1L4   | 1 | -----                                                         |                   |
| OsDOG1L5-1 | 1 | -----                                                         |                   |
| OsDOG1L5-3 | 1 | -----MAPSSLLIIF-----LLPTSRSSAL                                |                   |
| OsDOG1L5-4 | 1 | -----                                                         |                   |
| SbDOG1L1   | 1 | -----                                                         |                   |
| SbDOG1L2   | 1 | -----                                                         |                   |
| SbDOG1L4   | 1 | -----                                                         |                   |
| SbDOG1L5   | 1 | -----                                                         |                   |
| SoDOG1     | 1 | -----                                                         |                   |
| TaDOG1L1   | 1 | -----                                                         |                   |
| TaDOG1L2   | 1 | -----                                                         |                   |
| TaDOG1L4   | 1 | -----                                                         |                   |
| TaDOG1L5-1 | 1 | -----                                                         |                   |
| ZmDOG1L2   | 1 | -----                                                         |                   |
| ZmDOG1L3   | 1 | -----                                                         |                   |
| ZmDOG1L4   | 1 | -----                                                         |                   |
| ZmDOG1L5-1 | 1 | -----                                                         |                   |
| ZmDOG1L5-3 | 1 | -----                                                         | -MELYSGYLDDHFNPHK |
| ZmDOG1L5-4 | 1 | MGDTSSSSHSRQDPSLLGYGFHGAIANSTPPANFFDQGGGGTYFGELEEA FMHQVASLRR |                   |

|            |    |                                                                |
|------------|----|----------------------------------------------------------------|
| AtDOG1     | 1  | -----                                                          |
| AtDOGL1    | 1  | -----                                                          |
| AtDOGL2    | 1  | -----                                                          |
| AtDOGL3    | 1  | -----                                                          |
| AtDOGL4    | 1  | -----                                                          |
| AtDOGL5    | 1  | -----                                                          |
| BdDOG1L1   | 1  | -----                                                          |
| BdDOG1L2   | 1  | -----                                                          |
| BdDOG1L3   | 1  | -----                                                          |
| BdDOG1L4   | 1  | -----                                                          |
| BdDOG1L5-1 | 1  | MDYAS-----PGG-----TDTSTDPGIAKKNQ-----                          |
| BdDOG1L5-3 | 9  | --PAAAAAEDARGPMPGFGAPQHTIPTDVNIMQTSRVTDGFGALAQSA GFRIEDLANLSAN |
| BdDOG1L5-4 | 9  | --PAAAAAEDARGPMPGFGAPQHTIPTDVNIMQTSRVTDGFGALAQSA GFRIEDLANLSAN |
| BrDOG1     | 1  | -----                                                          |
| HvDOG1L1   | 1  | -----                                                          |
| HvDOG1L2   | 1  | -----                                                          |
| HvDOG1L3   | 1  | -----                                                          |
| HvDOG1L5-2 | 10 | PAAAAAAAGDPRGPMPGFGAPQHTIPTDVNIMQPSRVADFGALAHSA GFRIEDLANFSTN  |
| HvDOG1L5-3 | 1  | -----MAEASPR-----TETS-DDTDENLM-----                            |
| LesadOG1   | 1  | -----                                                          |
| LsDOG1     | 1  | -----                                                          |
| OsDOG1L1   | 1  | -----                                                          |
| OsDOG1L3   | 1  | -----                                                          |
| OsDOG1L4   | 1  | -----                                                          |
| OsDOG1L5-1 | 1  | -----MADASSR-----TDTSTVLDTDDKN-----                            |
| OsDOG1L5-3 | 22 | VTHATVSSTVAFQELLLCPNPSSKSSSNLTAGGHLPLAVAAAAAAAQQHGVAVVGMAAH    |
| OsDOG1L5-4 | 1  | MFVASSPRKCPQGPCQAARTANQLQPGSSGSHR-----                         |
| SbDOG1L1   | 1  | -----                                                          |
| SbDOG1L2   | 1  | -----                                                          |
| SbDOG1L4   | 1  | -----                                                          |
| SbDOG1L5   | 1  | -----MADASPR-----TETSTDDTDDNHG-----                            |
| SoDOG1     | 1  | -----                                                          |
| TaDOG1L1   | 1  | -----                                                          |
| TaDOG1L2   | 1  | -----                                                          |
| TaDOG1L4   | 1  | -----                                                          |
| TaDOG1L5-1 | 1  | -----MADASSR-----TDNSTVLDNDGKIY-----                           |
| ZmDOG1L2   | 1  | -----                                                          |
| ZmDOG1L3   | 1  | -----                                                          |
| ZmDOG1L4   | 1  | -----                                                          |
| ZmDOG1L5-1 | 1  | -----MADASPR-----TETSTDDTDDNNG-----                            |
| ZmDOG1L5-3 | 17 | LSIAGSAVSPPEYMASASPAQFAAAPLRMGYGRPAPAPPPPPVMGMWSSEPFRVDSGSAHA  |
| ZmDOG1L5-4 | 61 | TQQAATVSAPHHGDTKPFPTAAGATAATATATARPPPTLDIFPAWPMRSRLHTPKECSNV   |

|            |     |                                                              |
|------------|-----|--------------------------------------------------------------|
| AtDOG1     | 1   | -----                                                        |
| AtDOGL1    | 1   | -----                                                        |
| AtDOGL2    | 1   | -----                                                        |
| AtDOGL3    | 1   | -----                                                        |
| AtDOGL4    | 1   | -----                                                        |
| AtDOGL5    | 1   | -----                                                        |
| BdDOG1L1   | 1   | -----                                                        |
| BdDOG1L2   | 1   | -----                                                        |
| BdDOG1L3   | 1   | -----                                                        |
| BdDOG1L4   | 1   | -----                                                        |
| BdDOG1L5-1 | 23  | -----                                                        |
| BdDOG1L5-3 | 67  | TLFNLKPNNHTFISDPLQFGNYGK-----                                |
| BdDOG1L5-4 | 67  | TLFNLKPNNHTFISDPLQFGNYGKSISPTDLATTAAAAAAAITTVDPQALLQQKGVQSN  |
| BrDOG1     | 1   | -----                                                        |
| HvDOG1L1   | 1   | -----                                                        |
| HvDOG1L2   | 1   | -----                                                        |
| HvDOG1L3   | 1   | -----                                                        |
| HvDOG1L5-2 | 70  | NLFNLKPNTTHAYTSDPLQFGNYGKSISPTDLATT---AAAAVTAVDPQALLQQKAVQPN |
| HvDOG1L5-3 | 20  | -----                                                        |
| LesDOG1    | 1   | -----                                                        |
| LsDOG1     | 1   | -----                                                        |
| OsDOG1L1   | 1   | -----                                                        |
| OsDOG1L3   | 1   | -----                                                        |
| OsDOG1L4   | 1   | -----                                                        |
| OsDOG1L5-1 | 21  | -----                                                        |
| OsDOG1L5-3 | 82  | QGMAAATAADRFCLPRMAAAAAAASQVEN-----                           |
| OsDOG1L5-4 | 34  | -----                                                        |
| SbDOG1L1   | 1   | -----                                                        |
| SbDOG1L2   | 1   | -----                                                        |
| SbDOG1L4   | 1   | -----                                                        |
| SbDOG1L5   | 21  | -----                                                        |
| SoDOG1     | 1   | -----                                                        |
| TaDOG1L1   | 1   | -----                                                        |
| TaDOG1L2   | 1   | -----                                                        |
| TaDOG1L4   | 1   | -----                                                        |
| TaDOG1L5-1 | 22  | -----                                                        |
| ZmDOG1L2   | 1   | -----                                                        |
| ZmDOG1L3   | 1   | -----                                                        |
| ZmDOG1L4   | 1   | -----                                                        |
| ZmDOG1L5-1 | 21  | -----                                                        |
| ZmDOG1L5-3 | 77  | TSASTVN-----                                                 |
| ZmDOG1L5-4 | 121 | TADSTDDSESSSKNHSNHSSDQLGAAAAAN-----                          |

|            |     |                                                               |
|------------|-----|---------------------------------------------------------------|
| AtDOG1     | 1   | -----                                                         |
| AtDOGL1    | 1   | -----                                                         |
| AtDOGL2    | 1   | -----                                                         |
| AtDOGL3    | 1   | -----                                                         |
| AtDOGL4    | 1   | -----                                                         |
| AtDOGL5    | 1   | -----                                                         |
| BdDOG1L1   | 1   | -----                                                         |
| BdDOG1L2   | 1   | -----                                                         |
| BdDOG1L3   | 1   | -----                                                         |
| BdDOG1L4   | 1   | -----                                                         |
| BdDOG1L5-1 | 23  | -----MFEQGHVA-ALKAFNSGDKS-                                    |
| BdDOG1L5-3 | 91  | -----FEQGHLA-APTGSDSSDKS-                                     |
| BdDOG1L5-4 | 127 | I VALRTRNSENWGESSMADTSPRTDTSTDPDIDVDERNQMFEQGHLA-APTGSDSSDKS- |
| BrDOG1     | 1   | -----                                                         |
| HvDOG1L1   | 1   | -----                                                         |
| HvDOG1L2   | 1   | -----                                                         |
| HvDOG1L3   | 1   | -----                                                         |
| HvDOG1L5-2 | 126 | L VALRTRNNENWGESSMADTSPRTDTSTDPDIDIDERNQMFEQGQLA-APTASDSSDKS- |
| HvDOG1L5-3 | 20  | -----LEPGNAA-LAVASDSSDRS-                                     |
| LesDOG1    | 1   | -----                                                         |
| LsDOG1     | 1   | -----                                                         |
| OsDOG1L1   | 1   | -----                                                         |
| OsDOG1L3   | 1   | -----                                                         |
| OsDOG1L4   | 1   | -----                                                         |
| OsDOG1L5-1 | 21  | -----QMVDGQSG-AIVPSNSSDRSD                                    |
| OsDOG1L5-3 | 111 | ----WGDSGVIVSSPFTDDTSTDLDSDADKHHLHALVGGGDDGDDAGEQRGADSSAVS-   |
| OsDOG1L5-4 | 34  | -----IDSMLGFA-AESARRIRSAR-                                    |
| SbDOG1L1   | 1   | -----                                                         |
| SbDOG1L2   | 1   | -----                                                         |
| SbDOG1L4   | 1   | -----                                                         |
| SbDOG1L5   | 21  | -----LEPGPGA-LGVASDSSDRS-                                     |
| SoDOG1     | 1   | -----                                                         |
| TaDOG1L1   | 1   | -----                                                         |
| TaDOG1L2   | 1   | -----                                                         |
| TaDOG1L4   | 1   | -----                                                         |
| TaDOG1L5-1 | 22  | -----RLEQGQSGGAIMASNSSDRSD                                    |
| ZmDOG1L2   | 1   | -----                                                         |
| ZmDOG1L3   | 1   | -----                                                         |
| ZmDOG1L4   | 1   | -----                                                         |
| ZmDOG1L5-1 | 21  | -----LEPGRGG-L-VASDSSDRS-                                     |
| ZmDOG1L5-3 | 84  | -----TKLEETRLEDDAQVALEPARSTE                                  |
| ZmDOG1L5-4 | 151 | -----MASQFEQASQQQLQHKNMATSSTP                                 |

|            |     |                                                               |
|------------|-----|---------------------------------------------------------------|
| AtDOG1     | 1   | -----                                                         |
| AtDOGL1    | 1   | -----                                                         |
| AtDOGL2    | 1   | -----                                                         |
| AtDOGL3    | 1   | -----                                                         |
| AtDOGL4    | 1   | -----                                                         |
| AtDOGL5    | 1   | -----                                                         |
| BdDOG1L1   | 1   | -----                                                         |
| BdDOG1L2   | 1   | -----                                                         |
| BdDOG1L3   | 1   | -----MPTSLQRDAAAAAVSKERRAVRQP-----                            |
| BdDOG1L4   | 1   | -----                                                         |
| BdDOG1L5-1 | 42  | --KAKLGQNTLRRLAQNR-----DAARKSRLRK--KAYVQKLESSSLKLAQLEQE       |
| BdDOG1L5-3 | 109 | -RDQ-LDHKSLRRLAQNR-----EAARKSRLRK--KAYIQNLETSRLKLTQLEQE       |
| BdDOG1L5-4 | 185 | -RDQ-LDHKSLRRLAQNR-----EAARKSRLRK--KAYIQNLETSRLKLTQLEQE       |
| BrDOG1     | 1   | -----                                                         |
| HvDOG1L1   | 1   | -----                                                         |
| HvDOG1L2   | 1   | -----                                                         |
| HvDOG1L3   | 1   | -----                                                         |
| HvDOG1L5-2 | 184 | -RDK-LDHKSLRRLAQNR-----EAARKSRLRK--KAYIQNLESSRLKLTQLEQE       |
| HvDOG1L5-3 | 38  | -RDRNGDQKTMRRRLAQNR-----EAARKSRLRK--KAYVQQLENSRLKLTQLEQE      |
| LesadOG1   | 1   | -----                                                         |
| LsDOG1     | 1   | -----                                                         |
| OsDOG1L1   | 1   | -----                                                         |
| OsDOG1L3   | 1   | -----MRTPAAPCARACPPHAKKPRPIYAGPGWE                            |
| OsDOG1L4   | 1   | -----                                                         |
| OsDOG1L5-1 | 41  | RSDKPMDQKVLRLRLAQNR-----EAARKSRLRK--KAYVQQLESSSKLKLASLEQE     |
| OsDOG1L5-3 | 165 | -KERRGDQKMQRRLAQNR-----EAARKSRMRK--KAYIQQLESSRSKLMHLEQE       |
| OsDOG1L5-4 | 53  | --HTNFSRLLISAQAQEFNMVYASPGTDASTDPDIDKNIRMAYVQQLED SRMKLTQLEQE |
| SbDOG1L1   | 1   | -----                                                         |
| SbDOG1L2   | 1   | -----                                                         |
| SbDOG1L4   | 1   | -----                                                         |
| SbDOG1L5   | 39  | -KDKHGDQKTLRRLAQNR-----EAARKSRLRK--KAYVQQLENSRLKLTQLEQE       |
| SoDOG1     | 1   | -----                                                         |
| TaDOG1L1   | 1   | -----                                                         |
| TaDOG1L2   | 1   | -----                                                         |
| TaDOG1L4   | 1   | -----                                                         |
| TaDOG1L5-1 | 43  | RSDKPLDQKTLRRLAQNR-----EAARKSRLRK--KSYVQQLESSSKLKLAQLEQE      |
| ZmDOG1L2   | 1   | -----                                                         |
| ZmDOG1L3   | 1   | -----                                                         |
| ZmDOG1L4   | 1   | -----                                                         |
| ZmDOG1L5-1 | 38  | -KDKHGDQKTLRRLAQNR-----EAARKSRLRK--KAYVQQLENSRLKLTQLEQE       |
| ZmDOG1L5-3 | 107 | QETSRPPERAQRRLAQNR-----EAARKSRLRK--KAYIQQLETSRMKLSQLELE       |
| ZmDOG1L5-4 | 175 | RTGKALDPKVIRRLAQNR-----EAARKSRLRK--KAYIQQLESCKLKLSQMEQD       |

|            |     |                                                                                        |
|------------|-----|----------------------------------------------------------------------------------------|
| AtDOG1     | 1   | -----MGSSSKNIEQ-----AQDS- <b>Y</b> LEWMSLQSQRI <b>P</b> ELKQLLA                        |
| AtDOGL1    | 1   | -----                                                                                  |
| AtDOGL2    | 1   | -----MSLQTKHIDDLKEALM                                                                  |
| AtDOGL3    | 1   | -----MATSSSSYGIEQ-----LQKGC <b>Y</b> EWMSVQAKHIVDLKEALM                                |
| AtDOGL4    | 1   | -----MSKMRNLVEEK-----FLE <b>F</b> Y <b>E</b> SWVIQLELYLHQLLIAHN                        |
| AtDOGL5    | 1   | -----MSQETAIA-----SFKKFQ <b>Q</b> SWIEQLRNHLNHLRSAQN                                   |
| BdDOG1L1   | 1   | -MTAAS---RPQS-NG--EPLVDG-E-----PFTK <b>F</b> GCW <b>I</b> SEQSRDLAALREAAA              |
| BdDOG1L2   | 1   | -----MSAGMEAELE-----AAQRR <b>F</b> RLWFRGLRSLRRDLRSARW                                 |
| BdDOG1L3   | 26  | -----ARIMAHVA-----DMAAF <b>Y</b> DAWVGREEEIVADLTAALS                                   |
| BdDOG1L4   | 1   | -----MDMT-----RYFACH <b>Q</b> QW <b>I</b> AGQEAGLGELTAAAA                              |
| BdDOG1L5-1 | 88  | LLRARQQGYVTST--LGEQPH <b>P</b> ANGNG-----ALALDVE <b>Y</b> GRWLEEHN <b>K</b> QIDELRAAIS |
| BdDOG1L5-3 | 155 | LQRARQQGIFISS--SGDQSHSTSGNG-----ALAFDME <b>Y</b> ARWLEEHNKHINELRAGVN                   |
| BdDOG1L5-4 | 231 | LQRARQQGIFISS--SGDQSHSTSGNG-----ALAFDME <b>Y</b> ARWLEEHNKHINELRAGVN                   |
| BrDOG1     | 1   | -----MENKGKNIEQ-----AQAS <b>C</b> Y <b>Q</b> QWMSIQSQRVPELKQALA                        |
| HvDOG1L1   | 1   | -MTATS---RPQHNGSLARASDGGE-----SFAK <b>F</b> FE <b>C</b> WILEQSRDLAALR-AAA              |
| HvDOG1L2   | 1   | -----MELE-----AARR <b>F</b> QLWLRGLRSLRRDLRTARW                                        |
| HvDOG1L3   | 1   | -----MAHAG-----DMTAF <b>Y</b> GAWVGREEEIVSDLTAAALG                                     |
| HvDOG1L5-2 | 230 | LQRARQQGIFISS--SGDQAHSAGNG-----AVAFDME <b>Y</b> ARWLEEHNKHINELRAAAN                    |
| HvDOG1L5-3 | 85  | LQRARQQGIFISS--SADQSHSMSGNG-----ALAFDTE <b>Y</b> ARWLEEHN <b>R</b> QVNELRAAVN          |
| LesDOG1    | 1   | -----MGSSSKNIEE-----AQES <b>C</b> Y <b>Q</b> EWNNLQSQRV <b>P</b> DLKHLA                |
| LsDOG1     | 1   | -----MAKQMKHQ-----QFQ <b>C</b> YKNWVAQQQLDLDELLOTLT                                    |
| OsDOG1L1   | 1   | -MPPPPSP--HPPHRNGNHVPAPSG-E-----SFAK <b>F</b> FE <b>C</b> WILEQSRDLAALRSAAAS           |
| OsDOG1L3   | 30  | GQRMPASYLQPRRG <b>T</b> NGRRIMEHGAGE-----EMVAF <b>Y</b> EAWVGREERIVADLTDAAL-           |
| OsDOG1L4   | 1   | -----MGAA-----RHVAC <b>Y</b> QRW <b>I</b> AGQEAGLGLEEAASSA                             |
| OsDOG1L5-1 | 89  | INKARQQGIYISS--SGDQTHAMSGNG-----AMTFDLE <b>Y</b> ARWLEE <b>Q</b> NKQINELRTAVN          |
| OsDOG1L5-3 | 212 | LQRARQQGIFIATGGSGDHGHSIGNGG-----TLAFDLE <b>Y</b> ARWLDEHQ <b>R</b> HINDLRVALN          |
| OsDOG1L5-4 | 111 | LQRARQQGIIIST--SGDQQRSTSENE-----ALAFNME <b>Y</b> MRWLEEHN <b>K</b> QINELRS <b>A</b> VH |
| SbDOG1L1   | 1   | -MPATFPPPPPPPPPSHNLPPLLSSNE-----SFSK <b>F</b> FE <b>S</b> WIGEQSRDLEELRAAAS            |
| SbDOG1L2   | 1   | -----MELELE-----AATRR <b>F</b> HLWFRGLRSLRRDLASARW                                     |
| SbDOG1L4   | 1   | -----MDMA-----RYESC <b>Y</b> RHW <b>I</b> AGQEAGLAELEEAASA                             |
| SbDOG1L5   | 86  | LQRARQQGIFISS--SVDQSHSMSGNG-----ALAFDME <b>Y</b> ARWLEEHN <b>R</b> QISELRAGVS          |
| SoDOG1     | 1   | -----MEDKVKNIEQ-----AQES <b>C</b> Y <b>V</b> KWMSLQSQRI <b>P</b> ELKQALA               |
| TaDOG1L1   | 1   | -MTATS---RPQHPNGSLAPASDGGE-----SFAK <b>F</b> FE <b>C</b> WILEQSRDLAALR-AAA             |
| TaDOG1L2   | 1   | -----MELE-----AATRR <b>F</b> QLWLRGLRSLRRDLRTARW                                       |
| TaDOG1L4   | 1   | -----MAMA-----RYVAFH <b>Q</b> QW <b>I</b> AGQQAGLGELAEAAA                              |
| TaDOG1L5-1 | 91  | LQKARQQGIFISS--SGDQTHAMSGNG-----AMTFDLE <b>Y</b> TRWLEDQ <b>N</b> KQINELRTAVN          |
| ZmDOG1L2   | 1   | -----MELELE-----AAARR <b>F</b> HLWFRGLRSLRRDLASARW                                     |
| ZmDOG1L3   | 1   | -----MAAF <b>Y</b> DAWVGREEQIVAE <b>L</b> TAALA                                        |
| ZmDOG1L4   | 1   | -----MDMA-----RYESC <b>Y</b> RHW <b>I</b> AGQEAGLAELEEAASA                             |
| ZmDOG1L5-1 | 85  | LQRARQQGIFISS--SVDQSHSMSGNG-----ALAFDME <b>Y</b> ARWLEEHN <b>R</b> QISELRAGVS          |
| ZmDOG1L5-3 | 155 | LQRARQQGAYANS--GSMGDSALGYRCPIDPGVSVFEID <b>Y</b> SHWVDEQKRHTAELTSALQ                   |
| ZmDOG1L5-4 | 223 | MQRARTQGLFLGG-----DPGASTSSG-----AAMFDVE <b>Y</b> ARWLDNHSRR <b>L</b> AE <b>L</b> NGALH |

| Accession  | Length | Sequence                                                       |
|------------|--------|----------------------------------------------------------------|
| AtDOG1     | 35     | QRRSHG----DEDNDNKLRKLTGKIIGDFKNYAAKRADLAHRCSSNYYPATWNSPLEN-A   |
| AtDOGL1    | 1      | -----                                                          |
| AtDOGL2    | 17     | CQ-----RNND-DKLEDLVGKIVNDYHTYAGKRSELSYRCCAHYFAPSWNTPIEN-S      |
| AtDOGL3    | 38     | SH-----RSKEDHKLEELVGKIVNDFQKYTEKRSELSRRSSSYFAPSWNSPLEN-G       |
| AtDOGL4    | 36     | NN-----TMSETELRHLISKLTTHHKAYYTAKWAAIREDVLAFFGGSVWLNPLEN-A      |
| AtDOGL5    | 34     | HHRN-S----ATGDEERLREAVDRVMEHFEYHRAKMAATDKDVIEWMASPWASALER-S    |
| BdDOG1L1   | 44     | AAS-----SSSADLRRLVDRVLGHYEHYYRAKSAAAAADVRAFAPSWISTTES-L        |
| BdDOG1L2   | 36     | AG-----DDPAQLGKLGGFVAHFSDYCAAR--AELDPVLLLSAPWASPAERGA          |
| BdDOG1L3   | 59     | LSLS-----ARRREALAPLVDAAMDHVATYYEHKARLADRDVVAALDPRWLNPLER-T     |
| BdDOG1L4   | 30     | NAAARR-----ATEAELRAVVERCLRGYEEYATRRMAPEDGAFFAPPWCTTFEKE-A      |
| BdDOG1L5-1 | 140    | -----ARATDGDHLHAIVENIMAHYDEIFRLKSVATKANAFHVLAGAWTTPVER-C       |
| BdDOG1L5-3 | 207    | -----AHAGDDDLRSIVDCIMAHYDEFFRLKGVAAKADVHFVLSGMWKTTPAER-C       |
| BdDOG1L5-4 | 283    | -----AHAGDDDLRSIVDCIMAHYDEFFRLKGVAAKADVHFVLSGMWKTTPAER-C       |
| BrDOG1     | 36     | QRRTHEGTADAAADDNKLRLELTQNIIGDFKNYAGKRADLSHRCSSSYYPAPSWNTPLEN-A |
| HvDOG1L1   | 47     | TAR-----PHDADLRRLVDRVLGHYENYYRAKSAAAASADVLPMFAPSWISATES-L      |
| HvDOG1L2   | 30     | A-----DDPAQLAKLVAGYVSHFADYCAAR--AELDPVWTLAAPWASPVVERGA         |
| HvDOG1L3   | 31     | -----ARRRDALAPLVDAAMDHVATLYEHKASLADRDVVAALDQRWLNPLER-T         |
| HvDOG1L5-2 | 282    | -----AHAGDDDLRSIVDSIMAQYDEFFRLKGVAAKADVHFVLSGMWKTTPAER-C       |
| HvDOG1L5-3 | 137    | -----AHAGDTELRSVVEKIMSHYDEIFKQKGNAAKADVHFVLSGMWKTTPAER-C       |
| LesDOG1    | 36     | QRRSNK---ANTDNDNKLRLELLEKIIGDFKKYAGKRADLSHRCSSNYYPAPSWNTPLEN-A |
| LsDOG1     | 34     | NYP-----TDVDYLQLITKKIVSHFENYHNSRAELAKHDGPSFLAPSWGSTFEN-S       |
| OsDOG1L1   | 48     | AATNPA---APPDDAELHRLVNRVLGHYEHYYRTKSAAASTDVLRMFSPSWTSTTEN-L    |
| OsDOG1L3   | 81     | -LPA-----RRRRDVLAPLVDAAVGHVSEYERKARLADRDVVAALDPRWLNPLER-T      |
| OsDOG1L4   | 30     | NAAAGR-----ATDGE LRAVVERCMRGYAEYVSTRRALAREDDGAALFAPPWCTSFEN-S  |
| OsDOG1L5-1 | 141    | -----AHASDSDLRLIVDGIMAHYDEIFRLKGVAAKADVHFHILSGMWKTTPAER-C      |
| OsDOG1L5-3 | 267    | -----AQMSDDELCELVDAMMMHYDQVFRLLKS FATKSDVFHVLSGMWMSPAER-F      |
| OsDOG1L5-4 | 163    | -----THAGDDDLQSIVSNFMAHHEEIFRIKGLAAKADALHVLSATWRTPLER-C        |
| SbDOG1L1   | 52     | AEP-----AAPEADLRRLVDQVMGHYAQYYSTKAAAAGDVSMFPTPSWTSTTEN-L       |
| SbDOG1L2   | 32     | SD-----DAAALPALVGRFVAHLESYCAAR--AGLDPVWTLAPWATPAERGA           |
| SbDOG1L4   | 30     | NAAAGR-----ATDAELRAVVERCMRGYQDYATRRLALSREDGAFFAPPWCTAFEN-S     |
| SbDOG1L5   | 138    | -----AHASDSDLRSVVDKIMSHYDEIFRLKGNAAKADVHFHVLSGMWKTTPAER-C      |
| SoDOG1     | 36     | QRRSHEGTAAASADDNKLRDLIQKIIGDFKDYAGKRSDLSTRCSSSYYPAPSWNTPLEN-A  |
| TaDOG1L1   | 47     | TAR-----PDDADLRRLVDRVLGHYEHYYRAKSAAAASADVLPMFAPSWISATES-L      |
| TaDOG1L2   | 30     | A-----DDPAQLAKLVAGYVSHFADYCAAR--AELDPVWTLAAPWASPVVERGA         |
| TaDOG1L4   | 30     | NAAAGR-----ATDAELKTVVERCMRGYQEYAAASRRAMARENGAFAFPWCTAFEN-S     |
| TaDOG1L5-1 | 143    | -----AHASDSDLRLIVDGIMGHYDEIFKVKGVAAKADVHFHILSGMWKTTPAER-C      |
| ZmDOG1L2   | 32     | SD-----DPTAQLPAQVGRFVAHLESYCAAR--AGLDPVWTLAPWATPAERGA          |
| ZmDOG1L3   | 25     | -LQP-----RRRGDALALLVDGAVAHVAAYYEHKSRLADRDVVAALDPRWLNPIER-T     |
| ZmDOG1L4   | 30     | NAAAGR-----ATDAELRTVVERCMRGYQDYATRRLALSREDGVAFFAPPWCTAFEN-S    |
| ZmDOG1L5-1 | 137    | -----AHASDSDLRSVVDKIMSHYDEIFRLKGNAAKADVHFHVLSGMWKTTPAER-C      |
| ZmDOG1L5-3 | 212    | G-----QQTSELELRLLVETGLSNYEHFLFKIKAAAAANADVFYVMSGLWKTTPAER-F    |
| ZmDOG1L5-4 | 272    | -----AHLADGDLRAIVDDALTHHEDLFOLKAMAAKSDVFHLITGVWTTTPAER-C       |

|            |     |                                                                |
|------------|-----|----------------------------------------------------------------|
| AtDOG1     | 90  | LIWMGGCRPSSFFRLVYALCGSQTEIRVTQFLRNIDGYESSGGGGG--ASLSDLSAEQL-   |
| AtDOGL1    | 1   | -MALGETR-----GGIGGG--ESMSDLTAEQL-                              |
| AtDOGL2    | 67  | MLWMGGCRPSSFIRLIYALCGSQAETQLSQYLLKIDDDFDINHGG---FMSDLTATQL-    |
| AtDOGL3    | 89  | LLWMGGCRPSSFIRVIYSLCGSQAETQLSQYLLKIDENVEVNHGG---SMSDLNASQL-    |
| AtDOGL4    | 86  | CSWLTGWKPSMVFRMVDRLRKS RVLVLEA QVK-----                        |
| AtDOGL5    | 88  | LQWVGGRPTTLFHLVYTESSILFESRIVDILRG---FRTGD-----LSDLSPSQFR       |
| BdDOG1L1   | 94  | YLWC GGWRPTAALHLLYSKSGAQL E AQLPAFLDGTGSLRGDD-----LGGLSADQL-   |
| BdDOG1L2   | 83  | AYWLAGWRPTTVVHLLYTESSRRFEAQLPDL L LG---VRSGN-----LGDLSPAQL-    |
| BdDOG1L3   | 111 | FLWAWG WKPALVFRFVDEAAVGS---AQQR-----                           |
| BdDOG1L4   | 83  | VLWLGGCRPSLSIRLLYCVSSEGLEAQLQEF LSGHGRAGGDDMIRPTGSGLLG INAMQL- |
| BdDOG1L5-1 | 189 | FLWLSGFRPSEL PKLLASQLEPLTEKQLAS-----                           |
| BdDOG1L5-3 | 256 | FMWLGGFRSSELLKLLAGQLEPLTEQQLAG-----                            |
| BdDOG1L5-4 | 332 | FMWLGGFRSSELLKLLAGQLEPLTEQQLAG-----                            |
| BrDOG1     | 95  | LIWMGGCRPSSFFRLVYALCGSQTEIRVTQFLRNIDGYDYS GSGG--ASLSDLTAEQL-   |
| HvDOG1L1   | 97  | YLWC GGWRPTAAVQLLYSKSGVQLEAQLPAFLDG-GSLGDGD-----LGGLSAEQL-     |
| HvDOG1L2   | 76  | AHWLAGWRPTTLVHLLYTESGRRFEAQLPDL L LG---VRSGN-----LGDLSPAQL-    |
| HvDOG1L3   | 79  | FLWAWGWRPALVFRFVDGSGIG---PRQR-----                             |
| HvDOG1L5-2 | 331 | FMWLGGFRSSELLKLLAGQLEPLTEQQLTG-----                            |
| HvDOG1L5-3 | 186 | FLWLGGFRPSELLKLLSTQLEPLTEQQLSG-----                            |
| LesadOG1   | 92  | LLWMGGCRPSSFFRLVYALCGSETEIRVTQYLRDIDGLESSGGMG--TSLSDLTAEQL-    |
| LsDOG1     | 84  | FLWIGGCRPALMIRLLYALCGSHLNTHLEEFLEG-----VRHGN-----IGEISLQL-     |
| OsDOG1L1   | 103 | YLWC SGWRPTAALHLLYSKSGAQL E TQLPVFLAG-GGLGAGD-----LGDLSAEQL-   |
| OsDOG1L3   | 132 | FLWAWG WKPALVFRFADGAVAGGSSHQQQR-----                           |
| OsDOG1L4   | 83  | VLWIGGCRPSLTIRLLYSLSGEGLEEHIEEFISGRGALGAARG-----MGLLGITARQL-   |
| OsDOG1L5-1 | 190 | FLWLGGFRSSELLKLLVNQLEPLTEQQLLG-----                            |
| OsDOG1L5-3 | 316 | FMWLGGFRSSELLKVLASHLEPLTDQQLMG-----                            |
| OsDOG1L5-4 | 212 | FLWLGGFRPSDLLKLLADQLEPLTEQQLAS-----                            |
| SbDOG1L1   | 103 | YLWC GGWRPTAAIQLLYTKCGMQLEHRLPVFLDG-GGLNKDD-----LSDLSVAQL-     |
| SbDOG1L2   | 79  | AYWLAGWRPTTLVHLLYTESGRRLEAQLPDL L LG---VRSGN-----LGDLTPAQL-    |
| SbDOG1L4   | 83  | LLWLGGCRPSLTVRLLYNISGEGLEAQVEEMLGGLTHGVIPTG-----ALGITS AQL-    |
| SbDOG1L5   | 187 | FLWLGGFRPSEVLKLLSTQLEPLTEQQLSG-----                            |
| SoDOG1     | 95  | LIWMGGCRPSSFFRLVYALCGSQTEIRVTQFLRNIDGYDSS GSGG--VSLSDITAEQL-   |
| TaDOG1L1   | 97  | YLWC GGWRPTAAIQLLYSKSGVQLEAKLPAFLDG-GSLGDGD-----LGGLSAEQL-     |
| TaDOG1L2   | 76  | AHWLAGWRPTTLVHLLYTESGRRFEAQLPDL L LG---VRSGN-----LGDLSPAQL-    |
| TaDOG1L4   | 83  | VLWLGGCRPSLAIRLLYSISGEGLEEDIEEFVSGRGRGLAEEM-----GLIGITATQL-    |
| TaDOG1L5-1 | 192 | FLWLGGFRPSELLKLLVNHLEPLTEQQMLG-----                            |
| ZmDOG1L2   | 79  | AYWLAGWRPTTLVHLLYTESGRRLEAQLPDL L LG---VRSGN-----LGDLTPAQL-    |
| ZmDOG1L3   | 76  | FLWAWG WKPALMFRFVESVGVG--LRLEQR-----                           |
| ZmDOG1L4   | 83  | VLWLGGCRPSLTVRLLYNLSGEGLEAQVEEMLGGLSNGVIPTG-----ALGITS AQL-    |
| ZmDOG1L5-1 | 186 | FLWLGGFRPSEVLKLLSTQLEPLTEQQLSG-----                            |
| ZmDOG1L5-3 | 262 | FLWIGGFRPSEVLKILSPQLEPLAEAQRM L-----                           |
| ZmDOG1L5-4 | 321 | FLWMGGFRPSDLLKTL L PQLDPLTEQQVVG-----                          |



|            |     |                                                              |
|------------|-----|--------------------------------------------------------------|
| AtDOG1     | 147 | -----AKINVLHVKIIDEEEKMTKKVSSLOEDAADIPIATVAYEM-----           |
| AtDOGL1    | 25  | -----FKINELHLKTVEAENKLTKVSAASLOEDTADTPIAFAAFYK-----          |
| AtDOGL2    | 122 | -----GKLNDLHLEVIKKEDKITKTSANFQDDVADLPPIA-----                |
| AtDOGL3    | 144 | -----AKINDLHIKVIKEDDKITKKSANLOENVADMPIAIAAYAT-----           |
| AtDOGL4    | 118 | -----KLEELRVKTKFDEQKIEREMERYQVAMADRKMMVELARLG-----           |
| AtDOGL5    | 137 | VPFVKGRTVSELQCETVKEENATEELSEWQDDASDLV-----                   |
| BdDOG1L1   | 145 | -----HAADQLQRRITIGREREIEEAAAAAQESLATGKMVELAT-----            |
| BdDOG1L2   | 131 | -----AQIDELQRRRAVAEEDALSREMARLQEGHGVVG-----                  |
| BdDOG1L3   | 138 | -----RGLEDLRASTAAAEEREVEVAAMQESLAGPRVLAALRRQ-----            |
| BdDOG1L4   | 142 | -----EQINNHLHGRTIHEEGILSERLASLOEKIADRPLLPIVRER---EQERARAAAL  |
| BdDOG1L5-1 | 219 | -----ICSLRQSSQQAEDTLSRDMEVLLQSAAEIVAS--GTSPTWY-----          |
| BdDOG1L5-3 | 286 | -----ICNLQSSQQAEDALSQGMEALQQSLAETLAS--GSLGPAGS-----          |
| BdDOG1L5-4 | 362 | -----ICNLQSSQQAEDALSQGMEALQQSLAETLAS--GSLGPAGS-----          |
| BrDOG1     | 151 | -----AKINVLHVKIIDEEEKMTKKVSSLOEDAADIPISTVAYAE-----           |
| HvDOG1L1   | 147 | -----QAADQLHRRITIRREIEEAAAASAQESLATTRMVELAGK-----            |
| HvDOG1L2   | 124 | -----AQIDELQRRITVAQEDLSREMARVQEGDGLVG-----                   |
| HvDOG1L3   | 105 | -----RELEDLRATAAAEKEVDREVAAVQESLAGPRVLEALRQR-----            |
| HvDOG1L5-2 | 361 | -----ICNLQSSQQAEDALSQGMEALQQSLAETLAS--GSLGPAGS-----          |
| HvDOG1L5-3 | 216 | -----ICNLQSSQQAEDALSQGMEALQQSLAETLA--GSIGSSSGS-----          |
| LesadOG1   | 148 | -----AKINILHVKIIDEEEKMTKKVASLOEDAADIPIATVAYEE-----           |
| LsDOG1     | 132 | -----KRIDELHAKTIVSEDKLSSYMATLQEKIAGEPLVLLASGC-----           |
| OsDOG1L1   | 153 | -----QAADQLQRITVSKEREIENAAASAQVS-----                        |
| OsDOG1L3   | 162 | -----RALERVRAATAEAEREVDREVAVVQESLAGPRVLAALRR-----            |
| OsDOG1L4   | 137 | -----ELVNDLHRRITLRDEDALSDRLATLQEDVADRPLLPIVRER---ATAAAAALGA  |
| OsDOG1L5-1 | 220 | -----LSNLQSSQQAEDALSQGMEALQQSLADTLA--GSLGPS--GS-----         |
| OsDOG1L5-3 | 346 | -----ICNLQSSQQAEDALSQGMEALQQTLGDTLVSAATTVVSGGGG-----         |
| OsDOG1L5-4 | 242 | -----ICNQSSQQAEEETLSQGMEITQDSLAKTVAS--QLGRAGS-----           |
| SbDOG1L1   | 153 | -----RAADQLQHRTISREREIEEVAATAQEAALTSKTMVELAGGG-----          |
| SbDOG1L2   | 127 | -----AQVDDLQRRITVAEEDALAREMALVQEGHGVVAAPSA-----              |
| SbDOG1L4   | 135 | -----LLINDLHSRTVHQENALTDRLATLQEDIDRPLLPIVRQRGELAAAAAR--QGGA  |
| SbDOG1L5   | 217 | -----IGNLQSSQQAEDALSQGMEALQQSLAETLA--GSLSSSGS-----           |
| SoDOG1     | 151 | -----AKINVLHVKIIDEEEKMTKKVSSLOEDAADIPISTVAYAE-----           |
| TaDOG1L1   | 147 | -----QAADQLQRRITIRGEREIEEAAAAGAQESLATTKMVELAGK-----          |
| TaDOG1L2   | 124 | -----AQIDELQRRITVAQEDLSREMARVQEGHGAVG-----                   |
| TaDOG1L4   | 136 | -----QQINDLHRCITLRDEGYLTERLASLOENIADRPLLPIVREH---AVAATALVGQ  |
| TaDOG1L5-1 | 222 | -----LTNLQSSQQAEDALSQGMEALQQSLAETLA--GSLGSSAGS-----          |
| ZmDOG1L2   | 127 | -----AQVDDLQRRITVAEEDALAREMALVQEGHGVVVLPAAP-----             |
| ZmDOG1L3   | 104 | -----RALEELRGATAVAEREVDLQVAAVQESLAGPRVLAALRR-----            |
| ZmDOG1L4   | 135 | -----VLINDLHSRTVHQENALSDRLATLQEDIDRPLLPIVRQR--ELAAAAARLGAAAA |
| ZmDOG1L5-1 | 216 | -----ISNLQSSQQAEDALSQGMEALQQSLAETLA--GSLSSSGS-----           |
| ZmDOG1L5-3 | 292 | -----VGGLQHTSAQAEDALSQGMEKLQQNLAE TLTA--EADPFPGP-----        |
| ZmDOG1L5-4 | 351 | -----ICSLQSSQQAEEALSQGLEQLHQSLADTMAG--GSLTDDAN-----          |

|            |     |                                                                |
|------------|-----|----------------------------------------------------------------|
| AtDOG1     | 187 | -----ENVGE--PNVVVDQALDKQEEAMARLLVEADNLRVDTLAKIL-GT             |
| AtDOGL1    | 65  | -----EVIGQ--ADVVERALDKHEEDMGGLLVEADKLRMTTLTKIV-DI              |
| AtDOGL2    | 156 | -----DVVH--ADVAVEDALDKHEEGMAVLLAEADKLRFTLTKIV-DV               |
| AtDOGL3    | 184 | -----DLMN--GDVVVEDALDKYEEGMAVLMVEADKLRFTLTKIV-DV               |
| AtDOGL4    | 157 | -----CHVGGESVMVVEAAVRGLSMGLEKMKVKAADCVRCLKTLKGIL-DI            |
| AtDOGL5    | 175 | -----MGTSDDPDQIRIRRLAEIVHRTDDLRRLRTITRVV-EV                    |
| BdDOG1L1   | 183 | -----GAMEAAG-LEREMEAKAEGMRRVLEMAADGLRLDTMRAVV-AL               |
| BdDOG1L2   | 163 | -----GDGD-LDVEGIVRRAGAVVAGADALRLRTLKRAV-EI                     |
| BdDOG1L3   | 178 | -----LHSPRNG-EADEAVAAVGRSLRVLLAAGDALRERTVGRVV-GL               |
| BdDOG1L4   | 192 | PRGSASSNGLVGRFAAMGLAG-VDAEVDAAAMESYTAGLAKLLEADQLRLSTTRELATET   |
| BdDOG1L5-1 | 258 | -----PAGSSGDTGQMSAAIGKLGAVESLLQQADELRLRLRDLRVQ-RI              |
| BdDOG1L5-3 | 326 | -----SSNVANYMGQMAMAMGKLGTLLENFLRQADNLRRLQTLQQMQ-RI             |
| BdDOG1L5-4 | 402 | -----SSNVANYMGQMAMAMGKLGTLLENFLRQADNLRRLQTLQQMQ-RI             |
| BrDOG1     | 191 | -----EHVGE--PNAMVDQALDKQEEAMATLLAEADNLRVDTLAKII-EI             |
| HvDOG1L1   | 186 | -----GGMDAAEGMEREMDAKAEAMKRVLEMAADGLRLLETLRGVV-GL              |
| HvDOG1L2   | 156 | -----AGGELLDVGGLVGRVGAVVAGADALRLRTLTKRAV-EI                    |
| HvDOG1L3   | 145 | -----RQHPRNGVQADEAVAAVGQSLRVLLARGDALRERTVGRVV-RV               |
| HvDOG1L5-2 | 401 | -----SGNVASYMGQMAMAMGKLGTLLENFLRQADNLRRLQTLQQMQ-RI             |
| HvDOG1L5-3 | 257 | -----TGNVANYMGQMAMAMGKLGTLLENFLRQADNLRQQLTLQQMQ-RI             |
| LesadOG1   | 188 | -----EHVGK--PNMVVDQALDKQEEESMAKLLGEADNLRVETLVKIV-EI            |
| LsDOG1     | 172 | -----KGEGESSEGEVVDKAMDTHAPDLYNVLLEADKLRMKTLKGIL-EF             |
| OsDOG1L1   | 180 | -----DG-----                                                   |
| OsDOG1L3   | 201 | -----QHPRNG-EADEAVAAVGRSLRVLLAAADALRERTVDRDVV-GT               |
| OsDOG1L4   | 187 | GA-SCDGLATRTRLVVATPEGAVDHEVDAAIGRYKAGLGRLLLEEADELRMSTAQTLVTEI  |
| OsDOG1L5-1 | 259 | -----SGNVANYMGQMAMAMGKLGTLLENFLRQADNLRQQLTLHQM-Q-RI            |
| OsDOG1L5-3 | 389 | -----ADNVTNYMGQMAIAMAKLTTLENFLRQADLLRHQTLQQMH-RI               |
| OsDOG1L5-4 | 281 | -----SSSPSNAADHTAAALGKIGAMESLLQQAADMRMQSLQKMQ-RV               |
| SbDOG1L1   | 193 | -----GGGGGGMDAGAMDREMQTKAEGMRQVLEMAADGLRLETMRREV-AL            |
| SbDOG1L2   | 163 | -----DGSGLLDVAGLVRTARAVLDRADALRLRTLTKRAV-EI                    |
| SbDOG1L4   | 188 | VRGSCGGAVRRRLGVGAAGPGGGADAAVDAALDSYEAALARLLVEADELRMATSRTLATEI  |
| SbDOG1L5   | 256 | -----TGNVANYMGQMAMAMGKLGTLLENFLRQADNLRRLQTLQQMQ-RI             |
| SoDOG1     | 191 | -----EHVGE--PNVAVDQALDKQEEAMAALLAEADNLRVDTLISKII-EI            |
| TaDOG1L1   | 186 | -----GGVDAAEGMEREMDAKAEAMKRVLEMAADALRLETLRGVV-GL               |
| TaDOG1L2   | 156 | -----AGGELVDVGGLVGRVGAVLAGADALRLRTLTKRAV-EI                    |
| TaDOG1L4   | 186 | DR-SVKRDDIPGRLAAAESSGGLAAEVDAAAMESYSAGLARLLLEEADELRMSTARALATEI |
| TaDOG1L5-1 | 262 | -----SGNVANYMGQMAMAMGKLGTLLENFLRQADNLRQQLTLHQM-Q-RI            |
| ZmDOG1L2   | 164 | -----DGSGLLDVAGLVRRARAVLDRADALRLRTLTKRAV-EI                    |
| ZmDOG1L3   | 143 | -----QPLRNG-EAEDAVAVVGRSLRVLLAAADALRDRTLRGVV-GL                |
| ZmDOG1L4   | 188 | ASGSCDGAARRR-LRAARLG-AADAEVDAALDSYKAALSRLLEADELRMATARALATEI    |
| ZmDOG1L5-1 | 255 | -----TGNVANYMGQMAMAMGKLGTLLENFLRQADNLRRLQTLQQMQ-RI             |
| ZmDOG1L5-3 | 331 | -----PDPYMLQMATAVGILKELVNFTQADHLRLTLTLQQMH-KI                  |
| ZmDOG1L5-4 | 391 | -----MSFMSQMALALGKLANLEGFVIQADNLRQQLTLHQM-Q-RI                 |

|            |     |       |         |         |         |         |         |           |             |                        |            |             |         |               |
|------------|-----|-------|---------|---------|---------|---------|---------|-----------|-------------|------------------------|------------|-------------|---------|---------------|
| AtDOG1     | 229 | LSPVQ | QADFL   | LAGKKL  | LHLSM   | HEWGT   | MRDRRR  | RRDCM     | VDTEG       | NAGGEE                 | GK-----    |             |         |               |
| AtDOG1L1   | 107 | LTAV  | QAADF   | LLAGKKL | LHAMHEW | GKSREH  | RR---LE | ASGGD     | SGGNV       | TRE-----               |            |             |         |               |
| AtDOG1L2   | 197 | VTPL  | QAVEF   | LLAGKRL | QLSLH   | DRGRV   | R-----  | ADVC      | GGVG        | GAAV-----              |            |             |         |               |
| AtDOG1L3   | 225 | VTPV  | QAAEF   | LLAGKRL | LHLSL   | HEWGR   | VREEQ   | RFGCV     | RTDAAA      | ATGGAGTEKSKRSSLLM----- |            |             |         |               |
| AtDOG1L4   | 200 | LTPP  | QCVEFL  | AAAAT   | FQVQL   | RRWGN   | RNRHY   | VTHS----- |             |                        |            |             |         |               |
| AtDOG1L5   | 210 | LSPL  | QAAEF   | LVA     | AAELRT  | GVAGW   | GTSHD   | RRRS---   | SEV-----    |                        |            |             |         |               |
| BdDOG1L1   | 223 | LRPP  | QAVHF   | LAAAE   | LHLAV   | HHLG    | RKRDA   | HAAHA     | PE-----     |                        |            |             |         |               |
| BdDOG1L2   | 198 | LEPA  | QAAEL   | LVA     | ADMEI   | GFREF   | GLKHG   | DGGGE     | PSRGA-----  |                        |            |             |         |               |
| BdDOG1L3   | 219 | LGPE  | QAGAF   | VAAAL   | LRFHL   | GVRR    | AGRW    | SSGQG     | GGQRGL----- |                        |            |             |         |               |
| BdDOG1L4   | 251 | LTPR  | QAVEM   | LAAAK   | QLHLS   | ICDWS   | RRKE-   | GAQS      | ALLPP       | AATASSSSSSGRPNA-----   |            |             |         |               |
| BdDOG1L5-1 | 300 | LTTR  | QSAR    | ALLAI   | ISGYF   | SRLRAL  | SSLWI   | ARPST     | GMN-----    |                        |            |             |         |               |
| BdDOG1L5-3 | 368 | LTTR  | QSAR    | ALLAI   | ISDYF   | SRLRAL  | SSLWL   | ARP       | PRE-----    |                        |            |             |         |               |
| BdDOG1L5-4 | 444 | LTTR  | QSAR    | ALLAI   | ISDYF   | SRLRAL  | SSLWL   | ARP       | PRE-----    |                        |            |             |         |               |
| BrDOG1     | 233 | LTPV  | QAGDF   | LMA     | GKKLH   | LSMHQ   | WGAL    | RDRR      | RRECI       | IDAGNDGGGEEEK-----     |            |             |         |               |
| HvDOG1L1   | 227 | LRPA  | QAVHF   | LVA     | AAELH   | LAVHK   | FGQHK   | DGAAT     | AE-----     |                        |            |             |         |               |
| HvDOG1L2   | 192 | LEPA  | QASEL   | LVA     | ADMEI   | GFREF   | GLKY-   | DGVG---   | AGGS-----   |                        |            |             |         |               |
| HvDOG1L3   | 187 | VAPD  | PE----- |         |         |         |         |           |             |                        |            |             |         |               |
| HvDOG1L5-2 | 443 | LTTR  | QSAR    | ALLAI   | ISDYF   | SRLRAL  | SSLWL   | ARP       | PRE-----    |                        |            |             |         |               |
| HvDOG1L5-3 | 299 | LTTR  | QSAR    | ALLV    | ISDY    | SSRLRAL | SSLWL   | ARP       | KE-----     |                        |            |             |         |               |
| LesDOG1    | 230 | LSPV  | EANFL   | LAGKKL  | LHLSM   | HEWGT   | MRDRR   | RRRECI    | IEGGD       | KAKGEEEEKKQ-----       |            |             |         |               |
| LsDOG1     | 216 | LTPL  | QAVEF   | LVA     | AKKLH   | LSLHEW  | STRD    | TRMG      | ITQLL       | GGNNPSSSSGDP           | PPPET----- |             |         |               |
| OsDOG1L1   |     |       |         |         |         |         |         |           |             |                        |            |             |         |               |
| OsDOG1L3   | 241 | LAPD  | QAGAF   | LAA     | MLRFH   | LGVHRA  | GRNW    | GSGNG     | GRRGL-----  |                        |            |             |         |               |
| OsDOG1L4   | 246 | LTPR  | QAVET   | LVA     | AKQLH   | LKVRS   | WSRR    | GE---A    | AVTQ        | PARSP                  | VTLP       | PAPSS       | NP----- |               |
| OsDOG1L5-1 | 301 | LTIR  | QAA     | RALLAI  | IHDYF   | SRLRAL  | SSLWL   | ARP       | PRE-----    |                        |            |             |         |               |
| OsDOG1L5-3 | 431 | LTTR  | QAA     | RALLV   | ISDYF   | SRLRAL  | SSLWL   | ARP       | PRD-----    |                        |            |             |         |               |
| OsDOG1L5-4 | 323 | LTTR  | QSAR    | ALLI    | ISDYF   | SRLRAL  | NSLWI   | ARP       | QQ-----     |                        |            |             |         |               |
| SbDOG1L1   | 237 | LRPA  | QAVHF   | LAAAE   | LHLAV   | HDFG    | RKRKD   | GHAG      | NAAAAA      | AAPE-----              |            |             |         |               |
| SbDOG1L2   | 199 | LEPA  | QAAEL   | LVA     | ADLEI   | GFREF   | GLKH--  | GSG---    | RDG-----    |                        |            |             |         |               |
| SbDOG1L4   | 248 | LTPR  | QAVEM   | LAA     | GKHLH   | LAVRE   | WSRR    | EAGAA     | AAQQ        | LNGPS                  | AGTADS     | SSTS        | ATVRR   | IGH           |
| SbDOG1L5   | 298 | LTTR  | QSAR    | ALLV    | ISDY    | SSRLRAL | SSLWL   | ARP       | KE-----     |                        |            |             |         |               |
| SoDOG1     | 233 | LTPL  | QAADF   | LLAGKKL | LHLSM   | HEWGV   | VLDR    | RRRRE     | CIIDA       | VDDAG                  | GKEEK----- |             |         |               |
| TaDOG1L1   | 227 | LRPA  | QAVHF   | LVA     | AAELH   | LAVHK   | FGRR    | KDGA      | AAAAE-----  |                        |            |             |         |               |
| TaDOG1L2   | 192 | LEPA  | QAAEL   | LVA     | ADMEI   | GFREF   | GLKY-   | DGVG---   | AGGS-----   |                        |            |             |         |               |
| TaDOG1L4   | 245 | LTPR  | QAVEM   | LMA     | AKQLH   | LAVRD   | WSRR    | KEEGA     | QONAR       | LPRAA                  | AATTAP     | SG-SNP----- |         |               |
| TaDOG1L5-1 | 304 | LTIR  | QAS     | RALLAI  | IHDYF   | SRLRAL  | SSLWL   | ARP       | PRE-----    |                        |            |             |         |               |
| ZmDOG1L2   | 200 | LEPA  | QAAEL   | LVA     | ADLEI   | GFREF   | GLKH--  | GSG---    | RMT-----    |                        |            |             |         |               |
| ZmDOG1L3   | 183 | LATD  | QAGAV   | VAA     | MLRFH   | LGVRR   | AGRD    | WSSGH     | GAQ         | ORRA-----              |            |             |         |               |
| ZmDOG1L4   | 246 | LTPR  | QAVEM   | LAA     | GKHLH   | LSVRD   | WSRR    | EAA-      | AAGA        | QQQL                   | GGQS       | AGTD        | NTVR    | PST           |
| ZmDOG1L5-1 | 297 | LTTR  | QSAR    | ALLV    | ISDY    | SSRLRAL | SSLWL   | ARP       | KE-----     |                        |            |             |         |               |
| ZmDOG1L5-3 | 370 | LTPR  | QAARG   | LLAL    | GDYF    | QRLRT   | LSM     | WAAR      | PREA        | AVS-----               |            |             |         |               |
| ZmDOG1L5-4 | 429 | LTIV  | ROA     | ARCL    | LAI     | GEYHN   | RLRAL   | SSLWA     | SRPRE       | ILVT                   | DEGN       | CEIS        | IAAOP   | SONOFSTF----- |
