# Supplementary material for: Delay of Germination-1 (DOG1): A Key to Understanding Seed Dormancy
Source: MDPI journal article supplement (doi:10.3390/plants9040480), 2020-04-09
Supplement: s1 [file s1]

Table S1: Genes and proteins included in the phylogenetic tree (Fig. 1)

| Plant species                  | Gene or Protein | Accession Number |
|--------------------------------|-----------------|------------------|
| <i>Arabidopsis thaliana</i>    | AtDOG1          | NP_001330541     |
| <i>Arabidopsis thaliana</i>    | AtDOGL1         | NM_117982        |
| <i>Arabidopsis thaliana</i>    | AtDOGL2         | NM_117984        |
| <i>Arabidopsis thaliana</i>    | AtDOGL3         | NM_117985        |
| <i>Arabidopsis thaliana</i>    | AtDOGL4         | NM_117981        |
| <i>Arabidopsis thaliana</i>    | AtDOGL5         | NP_188106        |
| <i>Brassica rapa</i>           | BrDOG1          | RID45165         |
| <i>Lepidum sativum</i>         | LesaDOG1        | ACV41800         |
| <i>Lactuca sativa</i>          | LsDOG1          | ALS87234         |
| <i>Sisymbrium officinale</i>   | SoDOG1          | AIN76390         |
| <i>Brachypodium distachyon</i> | BdDOG1L1        | XP_003565204     |
| <i>Brachypodium distachyon</i> | BdDOG1L2        | XP_003565926     |
| <i>Brachypodium distachyon</i> | BdDOG1L3        | XP_003567594     |
| <i>Brachypodium distachyon</i> | BdDOG1L4        | XP_003560850     |
| <i>Brachypodium distachyon</i> | BdDOG1L5-1      | XP_003566099     |
| <i>Brachypodium distachyon</i> | BdDOG1L5-3      | XP_003564437     |
| <i>Brachypodium distachyon</i> | BdDOG1L5-4      | XP_003564436     |
| <i>Hordeum vulgare</i>         | HvDOG1L1        | BAJ05340         |
| <i>Hordeum vulgare</i>         | HvDOG1L2        | AK248238         |
| <i>Hordeum vulgare</i>         | HvDOG1L3        | BE601551         |
| <i>Hordeum vulgare</i>         | HvDOG1L5-2      | BAJ94197         |
| <i>Hordeum vulgare</i>         | HvDOG1L5-3      | BAJ90602         |
| <i>Oryza sativa</i>            | OsDOG1L1        | AK106273         |
| <i>Oryza sativa</i>            | OsDOG1L3        | BAB64034         |
| <i>Oryza sativa</i>            | OsDOG1L4        | CM000126         |
| <i>Oryza sativa</i>            | OsDOG1L5-1      | NP_001049945     |
| <i>Oryza sativa</i>            | OsDOG1L5-3      | EAZ36566         |
| <i>Oryza sativa</i>            | OsDOG1L5-4      | EAY98526         |
| <i>Sorghum bicolor</i>         | SbDOG1L1        | XP_002455164     |
| <i>Sorghum bicolor</i>         | SbDOG1L2        | XP_002441508     |
| <i>Sorghum bicolor</i>         | SbDOG1L4        | XP_002456383     |
| <i>Sorghum bicolor</i>         | SbDOG1L5-1      | XP_002457410     |
| <i>Triticum aestivum</i>       | TaDOG1L1        | BAJ05339         |
| <i>Triticum aestivum</i>       | TaDOG1L2        | AK332921         |
| <i>Triticum aestivum</i>       | TaDOG1L4        | AK330689         |

|                          |            |              |
|--------------------------|------------|--------------|
| <i>Triticum aestivum</i> | TaDOG1L5-1 | AK330559     |
| <i>Zea mays</i>          | ZmDOG1L2   | NP_001152723 |
| <i>Zea mays</i>          | ZmDOG1L3   | NP_001145406 |
| <i>Zea mays</i>          | ZmDOG1L4   | ACG36725     |
| <i>Zea mays</i>          | ZmDOG1L5-1 | NP_001132337 |
| <i>Zea mays</i>          | ZmDOG1L5-3 | ACN26043     |
| <i>Zea mays</i>          | ZmDOG1L5-4 | NP_001169220 |
